# Supplementary material for: Rossby waves driven by the Mid Mediterranean Jet impact the Eastern Mediterranean mesoscale dynamics
Source: PubMed Central journal article supplement — Sci Rep. 2024 Nov 28;14:29598. doi: 10.1038/s41598-024-80293-6 (PMC11604977; doi:10.1038/s41598-024-80293-6), 2024-11-28
Supplement: 41598_2024_80293_MOESM1_ESM.pdf [file 41598_2024_80293_MOESM1_ESM.pdf]

## Supplementary Information

### Cyprus Eddy tracking center

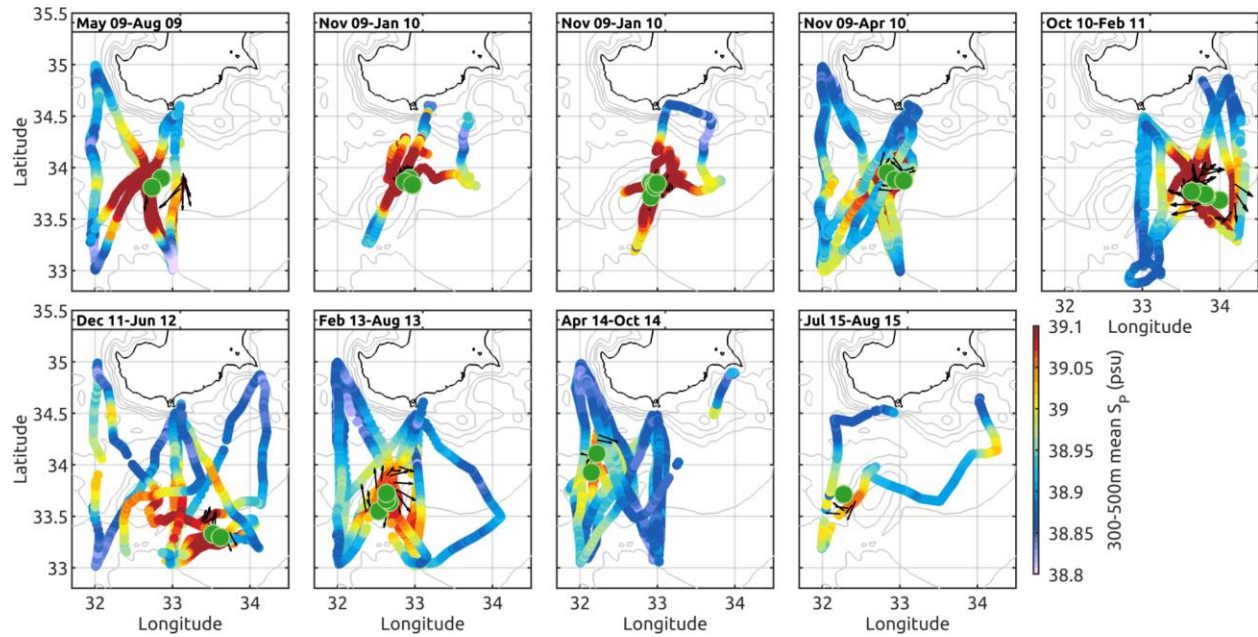

Figure S1: Map of glider deployments during the 2009-2015 period showing the detected CE center (green dots). The scatter plots show the mean salinity between 300 and 500 m as a proxy of the presence of the deep core of the CE. The black arrows are depth-average currents used to detect the CE centers.

## Rossby waves dispersion relation

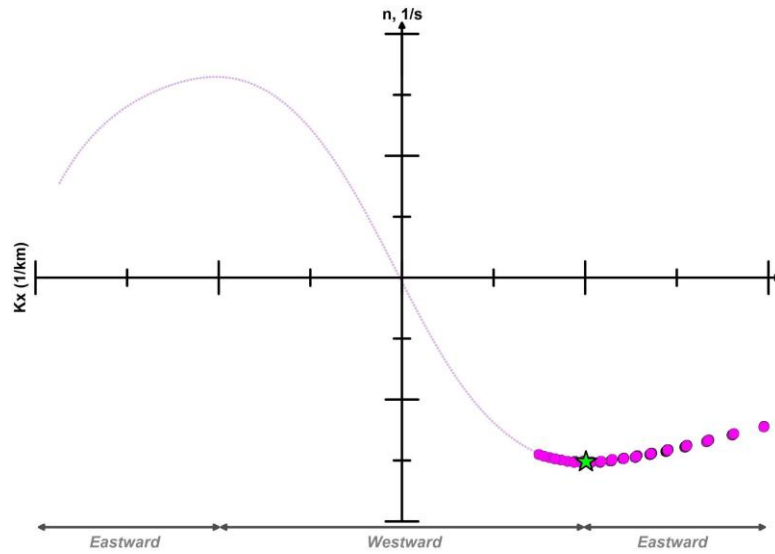

Figure S2: Dispersion relation of Rossby waves computed with data from TOEddies algorithm and for a constant meridional wavenumber  $K_y$  following Cushman 2009 (large magenta dots). Tiny magenta dots show the missing part of the theoretical curve. The green star indicates the reversal point from the eastward to westward energy propagation curve

### Theoretical and observed wavelengths

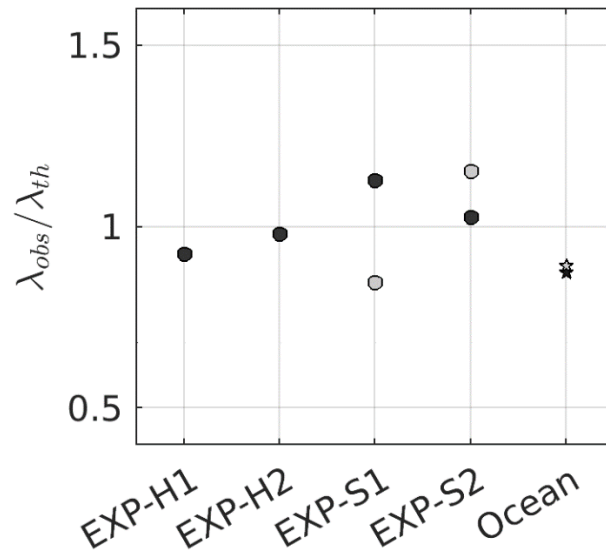

Figure S3: (a) Ratio of the experimental (circles) and ocean (stars) wavelengths normalized with the theoretical wavelengths. Black and gray symbols refer to values computed with wavelengths from the theoretical models ( $\lambda_{th}$  and  $\lambda_{MC}$  respectively). Note that for the ocean case we used  $\lambda_{obs} = 204$  km computed from January to May 2015.

### Water transport

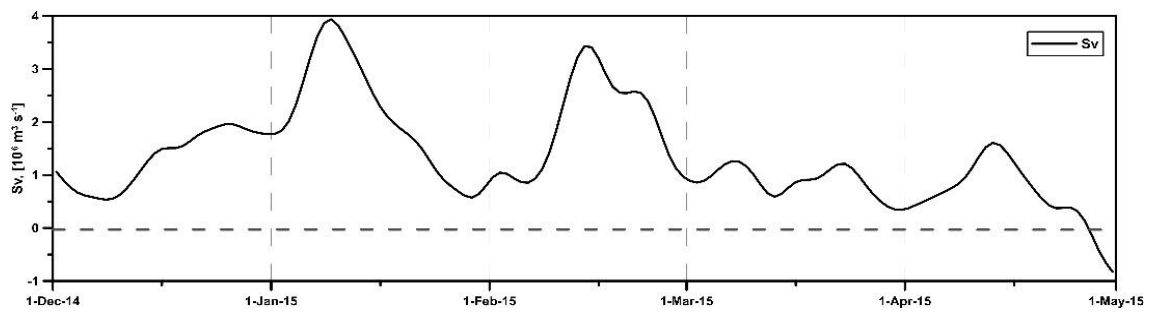

Figure S4: northward water transport in the upper 150 m along the zonal transect  $34.1^\circ \text{ N}$ ,  $35\text{--}36^\circ \text{ E}$
